# Supplementary material
Source: PubMed Central journal article supplement (PMC3183093)
Supplement: NIHMS36579-supplement-01.pdf [file NIHMS36579-supplement-01.pdf]

## Supplementary Information Titles

Please list each supplementary item and its title or caption, in the order shown below. Please include this form at the end of the Word document of your manuscript or submit it as a separate file.

**Note that we do NOT copy edit or otherwise change supplementary information, and minor (nonfactual) errors in these documents cannot be corrected after publication.** Please submit document(s) exactly as you want them to appear, with all text, images, legends and references in the desired order, and check carefully for errors.

|                                     |
|-------------------------------------|
| <b>Journal:</b> Nature Neuroscience |
|-------------------------------------|

|                              |                                                                                  |
|------------------------------|----------------------------------------------------------------------------------|
| <b>Article Title:</b>        | Experience-dependent expression of miR132 regulates ocular dominance plasticity. |
| <b>Corresponding Author:</b> | Pizzorusso                                                                       |
|                              |                                                                                  |

| Supplementary Item & Number | Title or Caption                                                                                        |
|-----------------------------|---------------------------------------------------------------------------------------------------------|
| Supplementary Figure 1      | Visual stimulation increases Lys4 dimethylation of Histone H3 in critical period mice.                  |
| Supplementary Figure 2      | c-fos staining is increased by visual stimulation in the visual cortex of P27 mice.                     |
| Supplementary Figure 3      | Specificity of ChIP experiments.                                                                        |
| Supplementary Figure 4      | Enhancement of pri-miR132 light induced expression by TSA treatment in adult mice.                      |
| Supplementary Figure 5      | MD causes decrease in p(Ser10) Ac(Lys14) H3 on specific CRE loci in the visual cortex of juvenile mice. |
| Supplementary Figure 6      | MiR132 mimic treatment <i>in vitro</i> .                                                                |
| Supplementary Figure 7      | <i>In vivo</i> effect of miR132 mimic infusion in the visual cortex of MD critical period mice.         |
| Supplementary Figure 8      | Three days miR132 mimic treatment increases the fraction of mushroom/stubby spines.                     |

|                         |                                                                                                                  |
|-------------------------|------------------------------------------------------------------------------------------------------------------|
| Supplementary Figure 9  | Mature miR132 levels after miR132 mimic or control miR infusion in the visual cortex of MD critical period mice. |
| Supplementary Figure 10 | MiRNA mimic treatment does not affect functional properties of visual cortical neurons.                          |
| Supplementary Methods   | Supplementary Methods                                                                                            |
